# Supplementary material for: OPTIKNEE 2022: consensus recommendations to optimise knee health after traumatic knee injury to prevent osteoarthritis
Source: HighWire-hosted journal article supplement (doi:10.1136/bjsports-2022-106299), 2022-11-15
Supplement: bjsports-2022-106299supp004_data_supplement.pdf [file bjsports-2022-106299supp004_data_supplement.pdf]

**SUPPLEMENTARY FILE 4: Example**

- 1. Examples to accompany the clinical and research recommendations**
- 2. Guidance for interpreting changes in patient reported outcomes, muscle function and functional performance outcomes**

## 1. Examples to accompany clinical and research recommendations

**Table 1. Examples\* to accompany clinical and research recommendations**

\*The table contains examples (not voted on) and is not meant to be an exclusive list

|                                                                                                                                                                                                                                                                                                                                                                                                                                                                                                                                                                                                                                                                                                                                                                                                                                                                                                                                                                                                                                                                                                                                                                                                                                                                                                                                                                                                                                                                                                                                                                                                                                                                                                                                                                                                                                             |
|---------------------------------------------------------------------------------------------------------------------------------------------------------------------------------------------------------------------------------------------------------------------------------------------------------------------------------------------------------------------------------------------------------------------------------------------------------------------------------------------------------------------------------------------------------------------------------------------------------------------------------------------------------------------------------------------------------------------------------------------------------------------------------------------------------------------------------------------------------------------------------------------------------------------------------------------------------------------------------------------------------------------------------------------------------------------------------------------------------------------------------------------------------------------------------------------------------------------------------------------------------------------------------------------------------------------------------------------------------------------------------------------------------------------------------------------------------------------------------------------------------------------------------------------------------------------------------------------------------------------------------------------------------------------------------------------------------------------------------------------------------------------------------------------------------------------------------------------|
| <p><b>C1. WHO to target to prevent PTOA:</b></p> <p>People with single and multi-structure injuries (particularly ACL tears, meniscal tears, intraarticular tibiofemoral fractures, and patellar dislocations with concomitant chondral lesions).</p> <p><u>Prioritise</u> people with symptoms and/or functional impairments that persist beyond usual recovery times, or with a subsequent injury.</p> <p><b>People to prioritise for PTOA prevention:</b></p> <ul style="list-style-type: none"> <li>• Unable to reach a patient acceptable symptom state</li> <li>• Hop test limb symmetry index &lt;90%<sup>1</sup></li> <li>• Quadriceps strength symmetry index &lt;80%<sup>2</sup></li> <li>• Hamstring strength symmetry index &lt;90%<sup>1</sup></li> <li>• Overweight or obese<sup>3</sup></li> <li>• ACL graft rupture or ACLR revision</li> </ul>                                                                                                                                                                                                                                                                                                                                                                                                                                                                                                                                                                                                                                                                                                                                                                                                                                                                                                                                                                             |
| <p><b>C2. WHAT and WHEN to target to prevent PTOA after traumatic knee injury:</b></p> <p>Promote knee health through <u>education</u>, <u>self-management</u>, mitigating known modifiable <u>risk factors for re-injury and non-traumatic OA</u>, and <u>person-centred goals</u>. Start these efforts at the time of injury (as possible) and continue across the lifespan.</p> <p><b>Education topics<sup>4-7</sup>:</b></p> <ul style="list-style-type: none"> <li>• Medium- and long-term impact of knee injuries on physical, mental and social health</li> <li>• Benefits of exercise (including strength training) and physical activity</li> <li>• Importance of preventing re-injury for OA prevention</li> <li>• Benefits and risks associated with surgery (including ACLR), and when and how to decide to progress to surgery</li> </ul> <p><b>Self-management topics<sup>6,8</sup>:</b></p> <ul style="list-style-type: none"> <li>• Self-monitoring function</li> <li>• Adjusting exercise prescription</li> <li>• Pacing exercise and physical activity</li> <li>• Overcoming pain/effusion flares</li> <li>• Seeking healthcare support</li> </ul> <p><b>Risk factors for re-injury and non-traumatic OA:</b></p> <ul style="list-style-type: none"> <li>• Unhealthy bodyweight<sup>3</sup></li> <li>• Lower-limb muscle weakness, especially quadriceps strength<sup>1,2</sup></li> <li>• Physical inactivity<sup>9</sup></li> <li>• Female sex<sup>10</sup></li> <li>• Premature return to sport<sup>11</sup></li> </ul> <p><b>Features of patient centred goals<sup>12</sup>:</b></p> <ul style="list-style-type: none"> <li>• Respect patients' values, preferences, expressed needs and available resources</li> <li>• Set in collaboration with the patient</li> <li>• Re-evaluated at regular intervals</li> </ul> |

**C3. WHAT TO DO after ACL tear:**

**First-line ACL tear treatment** includes education and exercise-therapy-based rehabilitation. Delay the decision to undergo ACLR until there is a 'quiet knee'. The decision to have an ACLR should be made by the patient (informed by relevant stakeholders) if they cannot achieve their acceptable functional level despite sufficient muscle function.

**ACL tear and ACLR rehabilitation** incorporates patient preferences, is goal and/or criterion-based, and begins with supervised rehabilitation then semi-supervised home (gym)-based rehabilitation to unsupervised home (gym) self-management.

**Core components of ACL tear and ACLR exercise-based rehabilitation** include: Weight-bearing, mobility, open and closed kinetic chain resistance-based, neuromuscular control and plyometric lower-limb exercises (including neuromuscular electrical stimulation to improve quadriceps strength); return to work, sport or other physical activity preparation; techniques to promote exercise adherence and self-management of knee health<sup>4</sup>; and cognitive behavioural techniques as appropriate.

**ACL tear and ACLR Rehabilitation DOES NOT** include blood-flow restriction training, whole-body vibration, continuous passive motion, or knee bracing.

**Return to pivoting sports criteria** after ACL tear or ACLR include being at least 9-months post-ACL tear or ACLR **AND** passing a return to sport test battery.

**Education topics:**

- Information about the injury
- Potential for tissue healing (e.g., ACL tear healing)
- Recovery timeline
- Management approaches (e.g., rehabilitation and/or surgery)
- Importance of (lifelong) self-management
- Return to activity criteria
- Risk for PTOA

**Quiet knee:**

- Little to no joint effusion or pain, full passive and active tibiofemoral and patellofemoral range of motion, straight leg raise with little to no extension lag, and little to no limp with gait.<sup>13</sup>

**Stakeholders:**

- Orthopaedic surgeon
- Rehabilitation professional
- Family members
- Coach

**Sufficient muscle function:**

- Limb symmetry index  $\geq 90\%$  but still experiencing activity-related knee giving away

**Supervised rehabilitation:**

- Clinic or gym based
- Group class
- Digital (telerehab)

**Exercise-based Rehabilitation:**

- Weight bearing (e.g., walking, step up) and mobility (e.g., cycling, stretching) exercises
- Open (e.g., knee extension, hamstring curl), and closed chain (e.g., leg press, step down, squat) resistance-based exercises
- Open and closed chain lower limb neuromuscular control exercises (e.g., one leg balance, lunge)
- Open and closed chain lower limb plyometric exercises (e.g., jumping, hopping, pivoting, skipping)

**Techniques for promoting exercise adherence and self-management<sup>14</sup>:**

- Social support (therapeutic alliance)<sup>15</sup>
- Action planning and goal setting (e.g., SMART goals)<sup>16</sup>
- Instruction of behaviour followed by demonstration of behaviour
- Feedback on behaviour
- Practice/rehearsal

**Cognitive behavioural techniques<sup>17</sup>:**

- Relaxation
- Reframing injury and recovery
- Coping modelling
- Guided imagery
- Guided discovery of movements associated with fear
- Exposure to movements that are associated with a lack of confidence or fear
- Mindful movement

**Return to sport test battery:**

- >90% on the Knee Outcome Survey (Activities of Daily Living Scale), global rating scale of function, quadriceps symmetry AND hop test battery (crossover hop, single hop, triple hop and 6m timed hop) symmetry<sup>11</sup>

**C4. WHAT TO MONITOR after a traumatic knee injury:**

**Core clinical outcomes** include: knee-related pain, other symptoms, adverse events, cognitive behavioural factors that influence learning and performance, physical function (e.g., self-reported function, functional performance and/or muscle function), QOL, and physical activity and sport participation.

**Other important clinical outcomes** can include: body weight, health-related QOL, participation in social roles, responsibilities and relationships (e.g., occupation, care-giving community participation), and injury-related mental health (e.g., depression, anxiety).

**Diagnostic imaging** is only indicated when results will inform treatment planning.

**Other symptoms:**

- Stiffness
- Functional instability
- Functional limitations
- Locking
- Clicking or crepitus

**Adverse events:**

- Contra-lateral knee injury
- Subsequent injury
- ACL graft rupture
- Giving away
- Locking

**Cognitive behavioural factors that influence learning and performance<sup>8 18</sup>:**

- Fear (re-injury, giving out, locking)
- Anxiety (re-injury, giving out, locking)
- Frustration
- Knee confidence
- Knee self-efficacy
- Psychological readiness to return to sport

**Physical activity and sport participation:**

- Step count (commercial fitness tracker e.g., Fitbit®, iWatch®)
- Minutes of moderate intensity physical activity (commercial fitness tracker e.g., Fitbit®, iWatch®)
- Return to physical activities<sup>19</sup>
- Recreational activities or sport
- Return to competition
- Level of competition
- Restricted participation in a desired activity

**C5. HOW TO MONITOR PATIENT-REPORTED OUTCOMES (PROs) after a traumatic knee injury:****Core clinical PROs to choose from to monitor MULTIPLE domains include:**

- IKDC-SKF (composite score of knee-related symptoms, function and sports activities)
- KOOS (composite score AND single scores for knee pain, other symptoms, function in daily living, function in sport/recreation, QOL)
- WOMET (overall composite score of knee-related physical symptoms, sports/recreation/work/lifestyle, and emotions; meniscal injury only)

**Other clinical PROs to choose from to monitor SINGLE domains include:**

- Pain: Numerical Rating Scale or Visual Analogue Scale
- Knee-related QOL: ACL QOL Score (ACL injury only)
- Health-related QOL: Visual Analogue Scale, or SF-12
- Knee-related cognitive behaviour factors: ACL-RSI Scale (ACL injury only), K-SES, or TSK-11
- Physical activity and sport participation: sport resumption and frequency
- Participation in social roles, responsibilities and relationships: occupation, care-giving and community
- Injury-related mental health: anxiety and depression

**Health-related quality of life Visual Analogue Scale:**

- At this moment how good or bad is your health? (0=the worst health you can imagine, 10=the best health you can imagine)

**Physical activity and sport participation<sup>19</sup>:**

- Since your knee injury have you attempted to do any recreational physical activity? (yes/no)
- Since your knee injury have you attempted training or competition in ANY sport? (no/yes-competition/yes-training only)
- Since your knee injury have you attempted training or competition in your MAIN pre-injury sport? (no/yes-at same or higher level/yes-at lower level, training only)
- Since your knee injury have you returned to your desired performance level? (no/yes)
- How many weeks in the last month have you done (*insert recommended number of minutes for your country*) minutes of moderate intensity physical activity?
- According to your commercial grade activity monitor (e.g., Fitbit®, iWatch®) what is your average weekly step count or minutes of exercise?

**Participation in social roles, responsibilities and relationships:**

- What (if any) social roles (e.g., committee leadership, coach, group membership, volunteer roles etc.), responsibilities (e.g., care provider, occupation etc.) and relationships (e.g., family role, friendships, mentor etc.) have been impacted by your knee injury?
- Which (if any) social roles, responsibilities and relationships are still impacted by your knee injury?

**Injury-related mental health<sup>20</sup>:**

- Depression
  - Patient Health Questionnaire 9 (PHQ-9)
  - Beck Depression Inventory (BDI) and BDI-II
  - Community Epidemiologic Survey Depression (CES-D) scale for DSM-III depression
  - Zung depression scale
  - Quick Inventory of Depressive Symptomatology (QIDS)
- Anxiety
  - Beck Anxiety Inventory (BAI)
  - General Anxiety Disorder Scale 7 (GAD-7)
- Depression and Anxiety
  - Hopkins's symptom checklist (SCL-90)
  - Hospital and Anxiety Scale (HADS)

**C6. HOW TO MONITOR MUSCLE FUNCTION after a traumatic knee injury**

**Core clinical knee muscle function measures** include: peak thigh muscle (knee extensor/flexor) strength.

**Clinical measures of peak knee extensor/flexor strength** include (as available):

- Computerized dynamometry (concentric isokinetic contraction at  $\geq 60^\circ/\text{s}$ )
- Hand-held dynamometry (isometric 1RM)
- Weight machine (concentric isotonic 1RM knee extension or knee flexor curl)

**Other important clinical muscle function measures** include: thigh muscle endurance and power, and trunk, hip and leg, muscle function.

**Computerized Dynamometry (concentric isokinetic contraction  $\geq 60^\circ/\text{s}$ ):**

- see Undheim et al<sup>21</sup> for an example protocol

**Hand-held Dynamometry (isometric 1RM):**

- see Sinacore et al<sup>22</sup> for an example protocol

**Weight machine (concentric isotonic 1RM):**

- see Sinacore et al<sup>22</sup> for an example protocol
- see National Strength and Conditioning Association<sup>23</sup>

**Knee extensor or Flexor Endurance:**

- Number of knee extension against a set weight until fatigue
- Number of hamstring curls against a set weight until fatigue

**Knee extensor or flexor Power:**

- Standing Broad Jump<sup>23</sup>
- Vertical Jump<sup>23</sup>

**Trunk Muscles:**

- Trunk flexors
- Trunk extensors
- Trunk side flexors
- Trunk rotators

**Hip Muscles:**

- Hip flexors
- Hip extensors
- Hip side flexors
- Hip rotators

**Leg Muscles:**

- Ankle plantar flexors
- Ankle dorsiflexors
- Ankle evertors
- Ankle invertors
- Toe extensors
- Toe flexors
- Foot intrinsics

**C7. HOW TO MONITOR FUNCTIONAL PERFORMANCE after a traumatic knee injury:**

**Core clinical measures of functional performance** include: hopping

**Clinical measures to estimate hop performance** include: a battery of forward (single and repeated), diagonal and/or vertical hop tests.

**Core clinical hop tests** include:

- Crossover hop (diagonal)
- Single hop (single-forward)
- Triple-hop (ciii) and 6m timed hop (repeated-forward)
- Vertical hop (vertical)

**Other important clinical measures of functional performance** include: balance, agility or other tasks meaningful to the patient.

**Crossover Hop Test:**

- see Kyritsis et al<sup>24</sup> and Xergia et al<sup>25</sup> for an example protocols

**Single Hop Test:**

- see Kyritsis et al<sup>24</sup> for an example protocol

**Triple Hop Test:**

- see Moksnes and Risberg<sup>26</sup> for an example protocol

**6-meter Triple Hop Test:**

- see Kise et al<sup>27</sup> for an example protocol

**Vertical Hop Test:**

- see Kotsifaki et al<sup>28</sup> for an example protocol

**Balance tests:**

- Y-balance test<sup>29</sup>
- STAR excursion balance test<sup>30</sup>

**Agility tests:**

- Shuttle run<sup>31</sup>
- T-ability test<sup>24</sup>
- Sprint test<sup>32</sup>
- Illinois agility test<sup>32</sup>
- Figure of 8 run<sup>33 34</sup>

**Other meaningful functional tasks:**

- Ascending or descending stairs or inclines
- Squatting
- Lunging
- Kneeling

# **C8. HOW TO INTERPRET PATIENT-REPORTED, MUSCLE FUNCTION, AND FUNCTIONAL PERFORMANCE outcome status and change:**

To **interpret the change** and **current state** of an outcome, ask the patient if they have noticed a meaningful change in the domain, and if they feel their current state is acceptable/satisfactory. To better **understand a patient's experience** of an outcome domain after a knee injury ask about responses to individual PRO items.

**Record** the baseline and follow-up score, and direction of change (either improvement or deterioration) in the outcome, if the patient felt the change was meaningful, and if they feel that their current state of that outcome is acceptable/satisfactory.

## **To understand the current state, change and a patient's experience of an outcome domain:**

- *'Have you noticed a meaningful change in your knee pain over the last 6 weeks?'*
- *'Taking into consideration all you do in a typical day, is the current state of your knee pain satisfactory?'*
- *'You indicate you are severely troubled by a lack of knee confidence; can you tell me a bit more about that? In what situations do you feel confident or lack confidence in your knee?'*

## **To document an outcome domain in a health record or report:**

- *Name had a 15% improvement in their maximal knee extensor strength over 4 weeks, (baseline scores = 25 lbs, follow-up score = 29 lbs)*
- *Name reports that after taking into account all they have to do in a typical day, the current state of their knee extensor strength is satisfactory.*

ACL (Anterior Cruciate Ligament), ACL-QOL (ACL Quality-of-Life Score), ACLR (ACL reconstruction), ACL-RSI (ACL Return to Sport after Injury scale), BMI (body mass index), EQ-5D (EuroQoL 5 Dimensions), GROC (Global Rate of Change), HHD (Hand-held dynamometry), IKDC-SKF (International Knee Documentation Committee Subjective Knee Form), K-SES (Knee Self Efficacy Scale), KOOS (Knee injury and Osteoarthritis Outcome Score), Lbs (pounds), m (meter), NRS (Numerical Rating Scale), PASS (patient acceptable symptom state), PTOA (post-traumatic osteoarthritis), PROs (patient-reported outcome measures), QOL (quality-of-life), RM (repetition maximum), SF-12 (Short Form 12), SF-36 (Short Form 36), SMART (specific, measurable, attainable, relevant, timebound), TSK (Tampa Scale of Kinesiophobia), WOMET (Western Ontario Meniscal Evaluation Tool).

## 2. Guidance for interpreting changes in patient reported outcomes, muscle function and functional performance outcomes

The following table contains information that will assist interpreting changes in patient reported, muscle function and functional performance outcomes.

### Considerations for Interpreting the Change Scores in Table 2:

- Patient reported outcome meaningful change scores:
  - Reflect what the average participant considers to be a threshold for a meaningful improvement and can guide the interpretation of outcome domains after knee injury.
  - Are based on the most conservative thresholds reported for persons who have had an ACL tear with or without a concomitant meniscal tear, or meniscal surgery, spanning gender and various timepoints post injury/surgery (6-24 months). As they are based on the most conservative threshold for what might be considered a severe intra-articular knee injury, they are less likely to lead to the interpretation that a change was meaningful when it was not, but may lead to missing a meaningful change when one has occurred.
  - Are likely to change as new knowledge becomes available.
- Muscle Strength outcome change scores:
  - Reflect variation or change in muscle strength scores that can guide interpretation of a true change (greater than measurement error) after knee injury.
  - Variation is based on reported coefficients of variation (standard deviation/mean).
  - Change is based on reported standard deviations of change ( $SDC = 1.96 * \sqrt{2} * \text{Standard Error of Measurement}$ ).
- Hop Test outcome change scores:
  - Reflect limb symmetry index values that can guide interpretation of a true change (greater than measurement error) after knee injury.
  - Limited by the observation that limb symmetry index is influenced by changes in performance of both the injured and contralateral leg.

Table 2. Guidance for interpreting changes in PROs, muscle function and hop performance

| Domain, Instrument and Meaningful Change Score |                                                                                                                                                                                                                                                                                                                                                                                                                                                                                                                                                                            | Evidence Level                                                                                                                                                                                              |
|------------------------------------------------|----------------------------------------------------------------------------------------------------------------------------------------------------------------------------------------------------------------------------------------------------------------------------------------------------------------------------------------------------------------------------------------------------------------------------------------------------------------------------------------------------------------------------------------------------------------------------|-------------------------------------------------------------------------------------------------------------------------------------------------------------------------------------------------------------|
| Patient Reported Outcome                       | <b>Multiple domain instruments change scores:</b> <ul style="list-style-type: none"> <li>• KOOS: see individual subscale change scores below</li> <li>• IKDC-SKF: change of 16/100 (ACL tear), 11/100 (meniscus tear)</li> <li>• WOMET: change of 15/100 (meniscus tear)</li> </ul>                                                                                                                                                                                                                                                                                        | ACL Tear<br>IKDC-SKF (Low credibility) <sup>35 36</sup><br>Meniscus Tear<br>IKDC-SKF (Very low credibility) <sup>35 37</sup><br>WOMET (Expert opinion) <sup>38 39</sup>                                     |
|                                                | <b>Knee-related pain instruments change scores:</b> <ul style="list-style-type: none"> <li>• KOOS<sub>Pain</sub>: change of 12/100</li> <li>• NRS and VAS: change of 1.5/10</li> </ul>                                                                                                                                                                                                                                                                                                                                                                                     | KOOS <sub>Pain</sub> (Low credibility) <sup>35</sup><br>NRS (Expert opinion) <sup>40</sup><br>VAS (Expert opinion) <sup>40</sup>                                                                            |
|                                                | <b>Knee-related other symptoms instruments change scores:</b> <ul style="list-style-type: none"> <li>• KOOS<sub>Symptoms</sub>: change of 6/100 (ACL tear), 12/100 (meniscus surgery)</li> </ul>                                                                                                                                                                                                                                                                                                                                                                           | KOOS <sub>Symptoms</sub> (Low credibility) <sup>35</sup>                                                                                                                                                    |
|                                                | <b>Knee-related physical function instrument change scores:</b> <ul style="list-style-type: none"> <li>• KOOS<sub>Sport/Rec</sub>: change of 22/100 (ACL tear), 17/100 (meniscus tear)</li> </ul>                                                                                                                                                                                                                                                                                                                                                                          | ACL Tear<br>IKDC-SKF (Low credibility) <sup>35 36</sup><br>KOOS <sub>Sport/Rec</sub> (Low credibility) <sup>35 41</sup><br>Meniscus Tear<br>IKDC-SKF (Very low credibility) <sup>35 37</sup>                |
|                                                | <b>Knee-related quality of life instruments change scores:</b> <ul style="list-style-type: none"> <li>• ACL QOL: change of 9/100</li> <li>• KOOS<sub>QOL</sub>: change of 18/100 (ACL tear), 17/100 (meniscus tear)</li> </ul>                                                                                                                                                                                                                                                                                                                                             | ACL Tear<br>ACL QOL (Very low credibility) <sup>42</sup><br>KOOS <sub>QOL</sub> (High credibility) <sup>35 41</sup><br>Meniscus Tear<br>KOOS <sub>QOL</sub> (Low credibility) <sup>2, 17</sup>              |
|                                                | <b>Knee-related cognitive behavioural factor instruments change scores:</b> <ul style="list-style-type: none"> <li>• ACL RSI: change of 3/100</li> <li>• K-SES: change of 15/100</li> <li>• TSK-17: change of 1/68 (ACL tear), 8/68 (meniscus tear)</li> <li>• TSK-11: change of 5/44</li> </ul>                                                                                                                                                                                                                                                                           | ACL Tear<br>ACL RSI (Low credibility) <sup>35 43</sup><br>K-SES (Expert opinion)<br>TSK-17 (Low credibility) <sup>35 44</sup><br>TSK-11 (Expert opinion)<br>Meniscus Tear<br>TSK-17/TSK-11 (Expert opinion) |
|                                                | <b>Health-related quality of life instruments change scores:</b> <ul style="list-style-type: none"> <li>• EQ-5D-5L Index: change of 0.12</li> <li>• SF-36 bodily pain: change of 8/100</li> <li>• SF-12: change of 5.1/100 (PCS), 4.3/100 (MCS)</li> </ul>                                                                                                                                                                                                                                                                                                                 | EQ-5D-5L (Expert opinion) <sup>45</sup><br>SF-36 (Expert opinion) <sup>46</sup><br>SF-12 (Very low credibility) <sup>2</sup>                                                                                |
|                                                | <b>Patient Global Assessment (PASS) instrument change scores:</b> <ul style="list-style-type: none"> <li>• IKDC-SKF: 85/100 (ACLR), 69/100 (meniscal surgery)</li> <li>• KOOS<sub>Pain</sub>: 93/100 (ACLR), 81/100 (meniscal surgery)</li> <li>• KOOS<sub>Symptoms</sub>: 83/100 (ACLR), 78/100 (meniscal surgery)</li> <li>• KOOS<sub>Sport/Rec</sub>: 88/100 (ACLR), 80/100 (meniscal surgery)</li> <li>• KOOS<sub>QOL</sub>: 79/100 (ACLR), 57/100 (meniscal surgery)</li> </ul>                                                                                       | Expert opinion <sup>2 11 16 17</sup>                                                                                                                                                                        |
| Muscle Strength                                | <b>Muscle strength<sup>a</sup></b> <ul style="list-style-type: none"> <li>• Peak concentric knee extensor strength (60°/s): variation<sup>a</sup> of 8.3%</li> <li>• Peak concentric knee extensor strength (180°/s): variation<sup>a</sup> of 2.9%</li> <li>• Peak isometric knee extensor normalised (BW) strength: change<sup>b</sup> of 1.7%</li> <li>• Peak concentric knee extensor strength LSI: change<sup>b</sup> of 10.5%</li> <li>• Peak concentric knee flexor strength (60°/s and 180°/s): variation<sup>a</sup> of 3.4% (60°/s) and 3.3% (180°/s)</li> </ul> | GRADE <sup>47</sup><br>Very low                                                                                                                                                                             |
| Hop Performance                                | <b>Hop performance<sup>b,c</sup></b> <ul style="list-style-type: none"> <li>• Crossover Hop Test (CHT): LSI change of 14.6%</li> <li>• Single Hop Test (SHT): LSI change of 6.7%-9.7%</li> <li>• Triple Hop Test (THT): LSI change of 12.0%</li> <li>• Vertical Hop: LSI change of 10.0%</li> <li>• 6-meter Timed Hop Test: LSI change of 15.5%</li> </ul>                                                                                                                                                                                                                 | SHT, CHT, 6mTH, THT GRADE<br>Very low <sup>48</sup><br>VH<br>Expert opinion                                                                                                                                 |

\*Change scores represent the most conservative average thresholds reported for persons who have had an ACL tear with or without a concomitant meniscal tear, or meniscal surgery, spanning gender and various timepoints post injury/surgery. As they are based on the most conservative threshold for what might be considered a severe intra-articular knee injury, they are unlikely to lead to the interpretation that a change was meaningful when it was not, but may lead to missing a meaningful change when one has occurred. Values are likely to change as new knowledge becomes available.

<sup>a</sup> Variation represents the coefficient of variation (standard deviation/mean)

<sup>b</sup> Change represents the standard deviation of change (SDC=1.96\*√2\*Standard Error of Measurement)

<sup>c</sup> Limb symmetry index (LSI) is influenced by changes in performance of both the injured and contralateral leg.

ACL (Anterior Cruciate Ligament), ACL-QOL (ACL Quality-of-Life Score), ACLR (ACL reconstruction), ACL-RSI (ACL Return to Sport after Injury scale), BW (body weight), EQ-5D-5L (EuroQol 5 Dimensions), GRADE (Grading of Recommendations, Assessment, Development and

Evaluation), IKDC-SKF (International Knee Documentation Committee Subjective Knee Form), K-SES (Knee Self Efficacy Scale), KOOS (Knee injury and Osteoarthritis Outcome Score including pain, other symptoms, function in sport and recreation and quality of life subscales), LSI (limb symmetry index), MCS (Mental Component Score), NRS (Numerical Rating Scale), OA (osteoarthritis), PTOA (post-traumatic osteoarthritis), PCS (Physical Component Score), PROs (patient-reported outcome measures), PTOA (post-traumatic osteoarthritis), QOL (quality-of-life), RM (repetition maximum), s (second), SF-12 (Short Form 12), SF-36 (Short Form 36), TSK (Tampa Scale of Kinesiophobia), VAS (Visual Analogue Scale), WOMET (Western Ontario Meniscal Evaluation Tool).

## REFERENCES

1. Filbay S, Gauffin H, Andersson C, et al. Prognostic factors for tibiofemoral and patellofemoral osteoarthritis 32-37 years after anterior cruciate ligament injury managed with early surgical repair or rehabilitation alone. *Osteoarthritis Cartilage* 2021 doi: 10.1016/j.joca.2021.08.009 [published Online First: 2021/09/10]
2. Oiestad BE, Juhl CB, Culvenor AG, et al. Knee extensor muscle weakness is a risk factor for the development of knee osteoarthritis: an updated systematic review and meta-analysis including 46 819 men and women. *Br J Sports Med* 2021 doi: 10.1136/bjsports-2021-104861 [published Online First: 2021/12/18]
3. Silverwood V, Blagojevic-Bucknall M, Jinks C, et al. Current evidence on risk factors for knee osteoarthritis in older adults: a systematic review and meta-analysis. *Osteoarthritis Cartilage* 2015;23(4):507-15. doi: 10.1016/j.joca.2014.11.019 [published Online First: 2014/12/03]
4. Whittaker JL, Runhaar J, Bierma-Zeinstra S, et al. A lifespan approach to osteoarthritis prevention. *Osteoarthritis Cartilage* 2021;29(12):1638-53. doi: 10.1016/j.joca.2021.06.015 [published Online First: 2021/09/25]
5. Whittaker JL, Roos EM. A pragmatic approach to prevent post-traumatic osteoarthritis after sport or exercise-related joint injury. *Best Pract Res Clin Rheumatol* 2019;33(1):158-71. doi: 10.1016/j.berh.2019.02.008 [published Online First: 2019/08/23]
6. Whittaker JL, Truong LK, Losciale JM, et al. Efficacy of the SOAR knee health program: protocol for a two-arm stepped-wedge randomized delayed-controlled trial. *BMC musculoskeletal disorders* 2022;23(1):85. doi: 10.1186/s12891-022-05019-z [published Online First: 2022/01/27]
7. Patterson BE, Barton CJ, Culvenor AG, et al. Exercise-therapy and education for individuals one year after anterior cruciate ligament reconstruction: a pilot randomised controlled trial. *BMC musculoskeletal disorders* 2021;22(1):64. doi: 10.1186/s12891-020-03919-6 [published Online First: 2021/01/13]
8. Truong LK, Mosewich AD, Miciak M, et al. Balance, reframe, and overcome: The attitudes, priorities, and perceptions of exercise-based activities in youth 12-24 months after a sport-related ACL injury. *Journal of orthopaedic research : official publication of the Orthopaedic Research Society* 2022;40(1):170-81. doi: 10.1002/jor.25064 [published Online First: 2021/05/06]
9. Wallace IJ, Worthington S, Felson DT, et al. Knee osteoarthritis has doubled in prevalence since the mid-20th century. *Proc Natl Acad Sci U S A* 2017;114(35):9332-36. doi: 10.1073/pnas.1703856114
10. Blagojevic M, Jinks C, Jeffery A, et al. Risk factors for onset of osteoarthritis of the knee in older adults: a systematic review and meta-analysis. *Osteoarthritis Cartilage* 2010;18(1):24-33. doi: 10.1016/j.joca.2009.08.010 [published Online First: 2009/09/16]
11. Grindem H, Snyder-Mackler L, Moksnes H, et al. Simple decision rules can reduce reinjury risk by 84% after ACL reconstruction: the Delaware-Oslo ACL cohort study. *Br J Sports Med* 2016;50(13):804-8. doi: 10.1136/bjsports-2016-096031
12. Davis K, Schoenbaum SC, Audet AM. A 2020 vision of patient-centered primary care. *J Gen Intern Med* 2005;20(10):953-7. doi: 10.1111/j.1525-1497.2005.0178.x [published Online First: 2005/09/30]
13. Failla MJ, Arundale AJ, Logerstedt DS, et al. Controversies in knee rehabilitation: anterior cruciate ligament injury. *Clin Sports Med* 2015;34(2):301-12. doi: 10.1016/j.csm.2014.12.008 [published Online First: 2015/03/31]
14. Meade LB, Bearne LM, Sweeney LH, et al. Behaviour change techniques associated with adherence to prescribed exercise in patients with persistent musculoskeletal pain: Systematic review. *Br J Health Psychol* 2019;24(1):10-30. doi: 10.1111/bjhp.12324 [published Online First: 2018/06/19]
15. Babatunde F, MacDermid J, MacIntyre N. Characteristics of therapeutic alliance in musculoskeletal physiotherapy and occupational therapy practice: a scoping review of the literature. *BMC*

- Health Serv Res* 2017;17(1):375. doi: 10.1186/s12913-017-2311-3 [published Online First: 2017/06/01]
16. Gutnick D, Reims K, Davis C, et al. Brief action planning to facilitate behavior change and support patient self-management. *J Clin Outcomes Manag* 2014;21(1):17-29.
  17. Coronado RA, Bird ML, Van Hoy EE, et al. Do psychosocial interventions improve rehabilitation outcomes after anterior cruciate ligament reconstruction? A systematic review. *Clin Rehabil* 2018;32(3):287-98. doi: 10.1177/0269215517728562 [published Online First: 2017/08/25]
  18. Truong LK, Mosewich AD, Holt CJ, et al. Psychological, social and contextual factors across recovery stages following a sport-related knee injury: a scoping review. *Br J Sports Med* 2020;54(19):1149-56. doi: 10.1136/bjsports-2019-101206 [published Online First: 2020/02/16]
  19. Ardern CL, Glasgow P, Schneiders A, et al. 2016 Consensus statement on return to sport from the First World Congress in Sports Physical Therapy, Bern. *Br J Sports Med* 2016;50(14):853-64. doi: 10.1136/bjsports-2016-096278 [published Online First: 2016/05/27]
  20. Kendrick T, El-Gohary M, Stuart B, et al. Routine use of patient reported outcome measures (PROMs) for improving treatment of common mental health disorders in adults. *Cochrane Database Syst Rev* 2016;7:CD011119. doi: 10.1002/14651858.CD011119.pub2 [published Online First: 2016/07/14]
  21. Undheim MB, Cosgrave C, King E, et al. Isokinetic muscle strength and readiness to return to sport following anterior cruciate ligament reconstruction: is there an association? A systematic review and a protocol recommendation. *Br J Sports Med* 2015;49(20):1305-10. doi: 10.1136/bjsports-2014-093962 [published Online First: 2015/06/25]
  22. Sinacore JA, Evans AM, Lynch BN, et al. Diagnostic Accuracy of Handheld Dynamometry and 1-Repetition-Maximum Tests for Identifying Meaningful Quadriceps Strength Asymmetries. *J Orthop Sports Phys Ther* 2017;47(2):97-107. doi: 10.2519/jospt.2017.6651 [published Online First: 2017/02/02]
  23. Baechle TR, Earle RW. Essentials of strength training and conditioning. 4th ed. Champaign IL: Human Kinetics 2016.
  24. Kyritsis P, Bahr R, Landreau P, et al. Likelihood of ACL graft rupture: not meeting six clinical discharge criteria before return to sport is associated with a four times greater risk of rupture. *Br J Sports Med* 2016;50(15):946-51. doi: 10.1136/bjsports-2015-095908
  25. Xergia SA, Pappas E, Zampeli F, et al. Asymmetries in functional hop tests, lower extremity kinematics, and isokinetic strength persist 6 to 9 months following anterior cruciate ligament reconstruction. *J Orthop Sports Phys Ther* 2013;43(3):154-62. doi: 10.2519/jospt.2013.3967 [published Online First: 2013/01/17]
  26. Moksnes H, Risberg M. Performance-based functional evaluation of non-operative and operative treatment after anterior cruciate ligament injury. *Scand J Med Sci Sports* 2009;19:345-55.
  27. Kise NJ, Roos EM, Stensrud S, et al. The 6-m timed hop test is a prognostic factor for outcomes in patients with meniscal tears treated with exercise therapy or arthroscopic partial meniscectomy: a secondary, exploratory analysis of the Odense-Oslo meniscectomy versus exercise (OMEX) trial. *Knee Surg Sports Traumatol Arthrosc* 2019;27(8):2478-87. doi: 10.1007/s00167-018-5241-7 [published Online First: 2018/11/18]
  28. Kotsifaki A, Van Rossom S, Whiteley R, et al. Single leg vertical jump performance identifies knee function deficits at return to sport after ACL reconstruction in male athletes. *Br J Sports Med* 2022;56(9):490-98. doi: 10.1136/bjsports-2021-104692 [published Online First: 2022/02/10]
  29. Whittaker JL, Toomey CM, Nettel-Aguirre A, et al. Health-related Outcomes following a Youth Sport-related Knee Injury. *Med Sci Sports Exerc* 2018;51(2):255-63. doi: 10.1249/MSS.0000000000001787
  30. Plisky PJ, Rauh MJ, Kaminski TW, et al. Star Excursion Balance Test as a predictor of lower extremity injury in high school basketball players. *J Orthop Sports Phys Ther* 2006;36(12):911-9. doi: 10.2519/jospt.2006.2244

31. Léger LA, Mercier D, Gadoury C, et al. The multistage 20 metre shuttle run test for aerobic fitness. *Journal of Sport Science* 1988;6(2):93-101.
32. Gabbett TJ. Physiological characteristics of junior and senior rugby league players. *Br J Sports Med* 2002;36(5):334-9. doi: 10.1136/bjism.36.5.334 [published Online First: 2002/09/28]
33. Risberg MA, Ekland A. Assessment of functional tests after anterior cruciate ligament surgery. *J Orthop Sports Phys Ther* 1994;19(4):212-7. doi: 10.2519/jospt.1994.19.4.212 [published Online First: 1994/04/01]
34. Pasanen K, Parkkari J, Pasanen M, et al. Effect of a neuromuscular warm-up programme on muscle power, balance, speed and agility: a randomised controlled study. *Br J Sports Med* 2009;43(13):1073-8. doi: 10.1136/bjism.2009.061747 [published Online First: 2009/07/23]
35. Macri EM, Young JJ, Ingelsrud LH, et al. Meaningful thresholds for patient-reported outcomes following interventions for anterior cruciate ligament tear or traumatic meniscus injury: an OPTIKNEE systematic review. *Br J Sports Med* Accepted
36. Tigerstrand Grevnerts H, Gravare Silbernagel K, Sonesson S, et al. Translation and testing of measurement properties of the Swedish version of the IKDC subjective knee form. *Scand J Med Sci Sports* 2017;27(5):554-62. doi: 10.1111/sms.12861 [published Online First: 2017/02/17]
37. Maheshwer B, Wong SE, Polce EM, et al. Establishing the Minimal Clinically Important Difference and Patient-Acceptable Symptomatic State After Arthroscopic Meniscal Repair and Associated Variables for Achievement. *Arthroscopy: The Journal of Arthroscopic & Related Surgery* 2021
38. Abram SGF, Middleton R, Beard DJ, et al. Patient-reported outcome measures for patients with meniscal tears: a systematic review of measurement properties and evaluation with the COSMIN checklist. *BMJ open* 2017;7(10):e017247.
39. Van Der Wal RJP, Heemskerk BTJ, Van Arkel ERA, et al. Translation and Validation of the dutch western ontario meniscal evaluation tool. *J Knee Surg* 2017;30(04):314-22.
40. Laigaard J, Pedersen C, Ronsbo TN, et al. Minimal clinically important differences in randomised clinical trials on pain management after total hip and knee arthroplasty: a systematic review. *Br J Anaesth* 2021;126(5):1029-37. doi: 10.1016/j.bja.2021.01.021 [published Online First: 2021/03/09]
41. Ingelsrud LH, Terwee CB, Terluin B, et al. Meaningful Change Scores in the Knee Injury and Osteoarthritis Outcome Score in Patients Undergoing Anterior Cruciate Ligament Reconstruction. *Am J Sports Med* 2018;46(5):1120-28. doi: 10.1177/0363546518759543 [published Online First: 2018/03/09]
42. Lafave MR, Hiemstra L, Kerslake S, et al. Validity, Reliability, and Responsiveness of the Anterior Cruciate Ligament Quality of Life Measure: A Continuation of Its Overall Validation. *Clin J Sport Med* 2017;27(1):57-63. doi: 10.1097/JSM.0000000000000292 [published Online First: 2016/01/19]
43. Slagters AJ, van den Akker-Scheek I, Geertzen JHB, et al. Responsiveness of the anterior cruciate ligament - Return to Sports after Injury (ACL-RSI) and Injury - Psychological Readiness to Return to Sport (I-PRRS) scales. *Journal of sports sciences* 2019;37(21):2499-505. doi: 10.1080/02640414.2019.1646023 [published Online First: 2019/07/25]
44. Huang H, Nagao M, Arita H, et al. Reproducibility, responsiveness and validation of the Tampa Scale for Kinesiophobia in patients with ACL injuries. *Health and quality of life outcomes* 2019;17(1):150.
45. Walters SJ, Brazier JE. Comparison of the minimally important difference for two health state utility measures: EQ-5D and SF-6D. *Quality of life research : an international journal of quality of life aspects of treatment, care and rehabilitation* 2005;14(6):1523-32. doi: 10.1007/s11136-004-7713-0 [published Online First: 2005/08/23]
46. Concoff A, Rosen J, Fu F, et al. A Comparison of Treatment Effects for Nonsurgical Therapies and the Minimum Clinically Important Difference in Knee Osteoarthritis: A Systematic Review. *JBJS Rev* 2019;7(8):e5. doi: 10.2106/JBJS.RVW.18.00150 [published Online First: 2019/08/16]

47. Urhausen A, Berg B, Oiestad BE, et al. Measurement properties for muscle strength tests following anterior cruciate ligament or meniscal injury – where do we need to go and what tests to use? A systematic review of measurement properties for the OPTIKNEE initiative. *Br J Sports Med* Under Review
48. Berg B, Urhausen AP, Oiestad BE, et al. What tests should be used to assess functional performance in youth and young adults following anterior cruciate ligament or meniscal injury? A systematic review of measurement properties for the OPTIKNEE consensus. *Br J Sports Med* 2022 doi: 10.1136/bjsports-2022-105510 [published Online First: 2022/06/14]
